# Supplementary material for: Anti-ferroptotic mechanism of IL4i1-mediated amino acid metabolism
Source: eLife. 2021 Mar 1;10:e64806. doi: 10.7554/eLife.64806 (PMC7946422; doi:10.7554/eLife.64806)
Supplement: Figure 1—source data 1. [file elife-64806-fig1-data1.xlsx]

## Sheet: Fig. 1F
hours	ctrl			2.5 µg/ml			1.25 µg/ml			0.62 µg/ml			0.31 µg/ml
0	13.8889	21.4444	15.7778	14	12.2222	11.3333	15.2222	16.1111	18.4444	12.8889	16.3333	16.1111	20.5556	17.8889	17.1111
2	18.1111	25.4444	20.1111	18.1111	17.3333	16	28.7778	32	35.4444	20.6667	22.2222	22.3333	24	23.5556	21.1111
4	21	25.3333	21.6667	29.2222	34.6667	31.3333	51	58	62.8889	35.4444	29.2222	30.7778	27.5556	25.7778	21.3333
6	22.1111	26.1111	25.1111	88	100	92.4444	111.333	116.111	116.556	42.3333	33.4444	37.1111	30.4444	27.4444	23.8889
8	25.3333	28.1111	29.2222	358.222	384.222	386.333	417	416.778	374.555	108.556	57.6667	57.3333	30.6667	30.1111	24.2222
10	28.5556	32.3333	30.5556	588	635	634.333	650.444	657.778	614.667	252.111	141	124.444	35.4444	32.7778	25.5556
12	31.2222	32.8889	33.2222	698.667	757.333	752.333	770.667	797.889	748.556	411.667	249.889	222.222	42	33	28.4444
14	31.4444	35.8889	33.3333	756.111	821.556	818	828.889	864	822.111	543.556	365.667	312.222	45.6667	36.5556	30
16	34.1111	40.4444	37.3333	781.333	849.444	849.556	850.111	894.889	850.333	635.889	448.555	386.778	48.4444	38.6667	33.8889
18	35.2222	43.5556	38.5556	790.889	860	863.444	867.222	910.333	859.889	687.556	505.667	430.778	51.2222	44.5556	35.1111
20	37.3333	45.6667	40.5556	794.556	868.444	874.333	866.333	917.222	868.333	717	534.222	459.333	54.5556	45.2222	40.4444
22	37.4444	53.7778	43.1111	797	874.333	878	869.778	921.778	866.333	734	551.889	471.333	56.7778	51.2222	41.6667
24	46.3333	54.5556	44.8889	798.778	873.222	879.778	874.333	921.889	870.667	743.889	564	486.555	60.8889	55.7778	45.1111

## Sheet: Fig. 1G
hours	ctrl			R320A K324A			WT
0	18.2222	22.3333	13.2222	16.3333	18.7778	21.1111	14	12.2222	11.3333
2	21.7778	28	15.7778	18.4444	21.1111	26.3333	18.1111	17.3333	16
4	25.1111	28.2222	20.7778	23.4444	24.5556	34.3333	29.2222	34.6667	31.3333
6	25.4444	31.2222	26.2222	26.8889	26	38.8889	88	100	92.4444
8	28.8889	33.1111	30.4444	28.1111	27.8889	44	358.222	384.222	386.333
10	29.5556	38.1111	34.1111	28.4444	29.4444	46	588	635	634.333
12	31.5556	40.3333	33.8889	28.7778	30.8889	48.3333	698.667	757.333	752.333
14	32.8889	42.6667	36.6667	30.4444	32.8889	47.4444	756.111	821.556	818
16	33.2222	43.7778	34.2222	32.2222	33.7778	47.8889	781.333	849.444	849.556
18	36.8889	46.7778	35.7778	35.6667	34.4444	51.1111	790.889	860	863.444
20	37.3333	50.7778	34	37	36.7778	51.4444	794.556	868.444	874.333
22	39	54.6667	36.4444	40.4444	36.1111	54.3333	797	874.333	878
24	43.8889	58.3333	40.5556	43.1111	37.8889	54.3333	798.778	873.222	879.778

## Sheet: Fig. 1H
hours	ctrl			LAAO			LAAO + Catalase
0	14.3333	14.3333	13.1111	11	12.8889	10.8889	11.5556	15	13.3333
2	14.8889	15.5556	14.4444	15.3333	18.6667	15.5556	14.5556	16.4444	15.8889
4	16	17	16.7778	29.7778	32.4444	32.5556	14.7778	18.5556	17.4444
6	17	16.5556	16.4444	60.2222	63.1111	61.2222	15.1111	18.7778	18.1111
8	18.2222	18.3333	17.6667	195.111	210.222	194.667	15.6667	19.2222	18.4444
10	18.7778	18.8889	19.6667	390.889	427.111	415.222	16.2222	19.6667	18.3333
12	19.1111	21.1111	19.4444	536.111	603.444	596.889	18.5556	21.1111	19.1111
14	19.2222	21.6667	20.4444	637.111	733.111	740.444	19	22	19.5556
16	21.2222	21.7778	21.4444	700.556	811	832.111	22.4444	23	20.6667
18	20.8889	22.3333	23.2222	733.889	858.333	887.222	23.8889	25.1111	22.4444
20	21.4444	23.1111	22.6667	750.556	886.444	922.333	25.5556	26.7778	23.4444
22	20.2222	22.1111	22.8889	761.556	900.556	941.333	27	27.6667	25.4444
24	21.3333	22.3333	22.6667	764.444	907.333	954.333	27.8889	29.7778	28.5556
