# Supplementary material for: Anti-ferroptotic mechanism of IL4i1-mediated amino acid metabolism
Source: eLife. 2021 Mar 1;10:e64806. doi: 10.7554/eLife.64806 (PMC7946422; doi:10.7554/eLife.64806)
Supplement: Figure 2—source data 1. [file elife-64806-fig2-data1.xlsx]

## Sheet: Fig.2 A
hours	hIL4i1 2.5 µg/ml			mIL4i1 2.5 µg/ml			N.n. LAAO 2.5 µg/ml
0	18	18.5556	19.6667	19.3333	13.6667	22.6667	20	18	17.5556
2	19.3333	19.1111	21.5556	22.3333	14.7778	25.1111	20.4444	20.4444	20
4	22.8889	20.1111	24.1111	24.8889	16.2222	25.4444	102.444	104.667	82.1111
6	24.4444	22.6667	26.4444	27.2222	18.5556	28.7778	1073.22	1071.56	1096.56
8	26	26	27.8889	27.6667	20.1111	28.5556	1437.11	1432	1513.44
10	27.5556	27	30.4444	32.1111	21.7778	31.2222	1487.56	1479.67	1562
12	28.2222	29.2222	35.1111	31.6667	22.8889	34.4444	1501.22	1496	1578.11
14	28.7778	31.5556	39.1111	34.5556	22.5556	36.2222	1505.22	1506.89	1582
16	31.6667	35	40.1111	37	24.6667	37.1111	1511.44	1513.56	1584.22
18	35	35.6667	48.5556	39.2222	26.6667	41.4444	1513.89	1516.89	1590.22
20	38.6667	37.8889	53.1111	43.4444	27.5556	48.6667	1513.33	1515.44	1587.22
22	42.3333	40.5556	55.3333	48.6667	28.5556	50.6667	1511	1518.22	1590.67
24	46.5556	42.6667	59.1111	51.6667	32.4444	49.6667	1513.67	1516.11	1585.56

## Sheet: Fig. 2C
Concentration (µg/mL)	N. naja			N. naja R320A K324A
0	520000	430000	430000	500000	520000	470000
0.0195	470000	470000	390000	490000	430000	480000
0.0391	400000	360000	380000	470000	410000	450000
0.0781	250000	280000	220000	410000	480000	500000
0.1563	90000	90000	70000	490000	410000	480000
0.3125	30000	40000	10000	620000	490000	500000
0.625	10000	0	0	430000	430000	500000
1.25	0	0	0	430000	590000	430000
2.5	0	0	0	530000	520000	410000
5	0	0	0	460000	550000	450000

## Sheet: Fig. 2D
Concentration [µg/ml]	Naja naja LAAO				Human IL4i1				Mouse IL4i1
0	490000	510000	630000	510000	510000	650000	590000	670000	630000	600000	550000	620000
0.0195	510000	490000	530000	580000	660000	650000	580000	690000	660000	590000	630000	490000
0.0391	500000	400000	630000	440000	680000	580000	700000	580000	490000	690000	580000	630000
0.0781	200000	200000	190000	170000	790000	760000	580000	610000	590000	600000	700000	580000
0.1563	10000	30000	50000	10000	810000	550000	680000	730000	720000	560000	670000	710000
0.3125	0	0	0	0		880000	670000	460000	580000	700000	650000	660000
0.625	0	0	0	0	750000	760000	690000	550000	650000	720000	520000	560000
1.25	0	0	0	0	630000	560000	630000	560000	730000	650000	500000	510000
2.5	0	0	0	0	580000	450000	790000	490000	220000	270000	190000	180000
5	0	0	0	0	390000	440000	470000	390000	50000	70000	60000	8000

## Sheet: Fig. 2E
	mIL4i1			hIL4i1			N. naja LAAO
Phe	330.572	246.661	452.305	893.312	694.359	930.959	1485.68	1239.43	1561.6
Tyr	82.0692	53.2661	96.5147	595.25	454.291	557.897	1496.1	1203.62	1413.57
Trp	64.3468	36.6641	79.5606	203.777	153.834	225.85	1345.92	1090.86	1396.54
Met	37.2257	20.3559	45.6567	141.04	106.471	153.929	1348.36	1043.77	1418.79
Leu	0.267382	0	0	5.36788	0	4.59654	1122.82	898.41	1268.81
Arg	6.04882	0	3.92601	16.6619	8.21587	18.3244	72.7911	51.16	91.4228
His	0.932788	0	0	4.59877	0	0	41.9986	24.8581	46.9072
Ile	0	0	0	0.792514	0	0	24.7524	12.8107	27.7164
Gln	3.6787	0	0	1.50416	0	0	15.9698	5.85399	16.778
Cys	0	0	0	0	0	0	15.6699	18.6666	34.2424
Val	2.2623	0	0	0.214242	0	0	5.40874	0	4.62239
Asn	2.56956	0	0	1.18568	0	0	4.11677	0	2.82819
Ala	0.029622	0	0	0.347002	0	0	3.21211	0	0
Lys	2.17793	0	0	1.44537	0	0	2.28545	0	0.343195
Thr	7.23039	0	0	0.098156	0	0	1.46961	0	0
Ser	2.20849	0	0	0.52488	0	0	1.04954	0	0
Gly	1.7344	0	0	0.319788	0	0	0.788081	0	0
Pro	0.129885	0	0	0.620025	0	0	0.114458	0	0
Glu	0	0	0	0.18771	0	0	0	0	0
Asp	1.53074	0	0	0.134783	0	0	0.387276	0	0

## Sheet: Fig. 2F
	24h			72h
PP	5.6357	5.35469	5.18127	6.94357	6.77308	5.67838
4HPP	4.74524	4.27595	4.4516	6.60146	6.40305	5.95543
I3P	2.71598	2.34297	2.47327	3.75408	4.02034	3.56399
KMBA	2.19731	2.40207	1.91826	4.06403	3.82081	3.31612
2OA	2.42775	2.32859	1.44887	4.53069	4.31642	3.92143
