# Supplementary material for: Anti-ferroptotic mechanism of IL4i1-mediated amino acid metabolism
Source: eLife. 2021 Mar 1;10:e64806. doi: 10.7554/eLife.64806 (PMC7946422; doi:10.7554/eLife.64806)
Supplement: Figure 4—source data 1. [file elife-64806-fig4-data1.xlsx]

## Sheet: Fig. 4B
hours	+ 2 µM Fer1			Erastin only			+ 200 µM PP			+ 200 µM HPP			+ 200 µM IP
0	17.3333	18	22.5556	19.5556	21.6667	16.1111	20.3333	18.1111	15.8889	12.5556	16.4444	17.5556	12.4444	13.3333	12.4444
2	20.3333	21	25.6667	21	24.2222	19.2222	24.4444	20.5556	19.4444	13.2222	18.4444	19	14.5556	16.4444	14
4	20.6667	21.7778	27	21.6667	27.3333	19.8889	26.1111	22.1111	20.1111	13.8889	20.1111	20.6667	15.5556	16.8889	14.8889
6	21.5556	22.8889	28.3333	23.1111	28.4444	19.4444	26.5556	22.6667	20.4444	14.5556	21.2222	23.2222	15.7778	17.7778	15
8	24.2222	24.3333	29.1111	24	29.7778	20.5556	27.6667	24.8889	21.8889	14.6667	23	25.5556	15.8889	19.1111	15.8889
10	25.6667	25.7778	32.1111	26.8889	32.4444	23.7778	31.5556	27.1111	24.3333	15.5556	25.3333	26.4444	16.6667	20.2222	19
12	28.7778	28.1111	36.6667	50	57.2222	34	63	48.8889	39	18.8889	27.4444	30.1111	18.4444	23.3333	20.2222
14	33.2222	30.4444	40.5556	277.445	288	181	290.889	248.111	183.667	21.5556	35.5556	47.6667	20.6667	26.7778	26
16	39.2222	34.1111	46.1111	732.222	775.333	653	734.222	674.778	565	32.5556	58.2222	84.3333	22.3333	30.6667	30.7778
18	43.5556	41.4444	52.3333	1097.67	1181	1083.44	1091.22	1035.11	935.333	43	83.2222	136.889	25.5556	35.8889	35
20	50.3333	45.1111	61	1366.56	1496.11	1436.33	1359.33	1314.89	1251.78	58	114.556	190	29.6667	46	39.7778
22	55.4444	51.3333	70.4444	1610	1785.44	1716.67	1586.56	1532.67	1530.11	91.3333	173.778	270.445	34.4444	56.6667	47.5556
24	65.4444	60.8889	78.6667	1825.67	2019	1954.78	1790.56	1736.89	1759.56	166	287.222	373.111	38.8889	67.4444	54.6667
26	73.5556	72.3333	91	2013.33	2208.89	2135.89	1954.33	1915.11	1974.56	275.555	428.222	503.222	49.2222	78.4444	63
28	87.1111	84.4444	105.889	2179.33	2368.89	2292.78	2105.44	2097.56	2166.67	392	583.111	648.333	61.8889	93.4444	73.2222
30	104.333	100.111	123.111	2306.56	2479.67	2405.67	2231.78	2243.78	2326	526.333	743.444	805	72	112.111	84.7778
32	124.556	116.444	146.111	2423.44	2584.33	2494.22	2339.33	2383.33	2455	654.222	888.778	941.444	82.4444	125.333	98.2222
34	146.667	130.111	161.778	2512.11	2668.78	2559.67	2430	2505.33	2579.11	777.556	1029.78	1071	95	145.444	109.444
36	164.444	148.222	181.222	2613.33	2759.78	2606.78	2506.78	2601.44	2669.67	901.333	1151.11	1175.89	106.667	167.222	123.444
38	194.222	170.333	205.333	2647.56	2783.78	2645.78	2538.33	2660.56	2732.11	1013	1274.56	1293.22	117.444	189.222	140.111
40	223.778	186.556	227.889	2693.44	2830.44	2670.56	2590.89	2718.89	2785.44	1107.33	1373.22	1383	133.444	212.222	165.778
42	247.222	212.111	254.889	2727	2847.78	2692.44	2614.78	2765.33	2824	1198.67	1452.67	1457.78	150.111	236.556	186.333
44	278	242.778	284.333	2772.56	2895.22	2704.56	2665.89	2794	2855.33	1264	1521.33	1491.33	171.889	265.222	209.778
46	311.555	267.445	314.778	2791.78	2908.78	2713	2685.33	2824	2875.67	1330.89	1576.33	1535.56	193.667	302.445	241.889
48	360.445	303.445	355.111	2785.56	2893.56	2712.33	2701	2844.22	2877.89	1390.67	1636.44	1606.78	224	340.667	279.333

## Sheet: Fig. 4C
hours	+ 2 µM Fer1			RSL3 only			+ 200 µM PP			+ 200 µM HPP			+ 200 µM IP
0	4.11111	4.44444	1.77778	5.66667	6.22222	4	3.77778	4.88889	4.33333	4.44444	4.77778	5	2.33333	4.33333	3.88889
2	5	5.77778	2.77778	48.7778	54.4444	49.3333	31.8889	29.3333	26.2222	14.5556	15.6667	17.6667	3.77778	4.77778	4.22222
4	5.77778	5.88889	3.22222	229.667	269.667	268.889	169	156.778	138.333	79.7778	88.2222	89.2222	3.66667	5.88889	4.33333
6	6.11111	6.22222	4.44444	378.889	449.222	449.222	309	302.555	260.778	145.889	156.778	159.222	4.55556	6.44444	5.11111
8	6.11111	6.55556	5.22222	463.111	557.222	566	413.555	409.778	349.778	201.333	224.333	215.333	5.77778	6.77778	5.55556
10	6.88889	7.88889	5.88889	501.778	614	628.778	481.445	473.667	404.667	253.667	274.222	266.555	6.66667	8.77778	7
12	6.77778	8.66667	7	523.778	646.333	664.333	524	516.333	439	296.889	322.333	308.222	6.88889	9.33333	6.77778
14	8.22222	9.88889	7.77778	537.222	665.667	691.778	554.444	550.222	467.667	332.333	361.778	347.667	8.11111	10.3333	9
16	9	10.5556	8.11111	541.889	672.667	697.444	582.444	565.889	481.555	363.333	394	378.111	9.66667	10.4444	10
18	10.2222	11	8.88889	547.889	681	704.889	601	583.667	494.445	387.667	419.667	401.778	11.8889	11.3333	10.3333
20	11.2222	11.6667	11.1111	552.111	685.444	712.222	613.111	597.111	506.667	414.445	448	425.667	13.3333	12.6667	10.4444
22	11.5556	12.5556	12.3333	555.111	690.333	717.667	622.556	608	517.333	434.333	475	447.889	14.7778	14.1111	12
24	12.5556	15.5556	12.6667	558.556	692.778	722.778	630.222	619.778	524.778	459.445	498.445	469.889	15.5556	14.7778	13.5556
26	13.1111	16.5556	14.2222	562.556	699.111	736.889	639.778	635	535	477.111	522.556	486.222	16.1111	16	15.4444
28	13.8889	17.3333	16.2222	565.444	698.333	733.111	654.333	639.444	537.556	495.555	542.778	505.111	16.1111	20.6667	15.4444
30	14.2222	18.1111	17.5556	566.444	702.333	738.111	660.778	646.556	542.333	514.222	564.222	521.667	18.1111	20.7778	19.1111
32	16.5556	18.1111	19.2222	569.556	703.556	740.222	670.222	651.889	547.333	531.556	583.889	535.444	19.8889	20	20.2222
34	17.2222	18.5556	18.6667	571.222	707.333	742.667	676.556	657.889	552.222	551	596.444	548.333	19.3333	20.4444	23.1111
36	19.1111	19.4444	18.6667	571.222	708.111	744.667	682	663.556	555.889	561.667	609.778	557.556	19	22.5556	24.1111
38	19.3333	21.5556	21.3333	571.444	710.222	746.556	686.889	668.222	559.889	575.556	620.444	567.444	20.6667	22.1111	25.4444
40	20.3333	23.7778	21.8889	573	713.333	748.222	691.667	670	564.111	586.889	630.333	576.667	22.5556	26	29.5556
42	21.8889	24.7778	22.8889	572.111	713.222	750.333	695.778	674.778	567.778	594	642.333	583.222	26.4444	26.6667	32.3333
44	22.3333	28.3333	24.2222	575.778	714	751.889	698.667	675.444	570.333	603.556	648.889	592.222	29.7778	29.4444	35.4444
46	25.4444	28.8889	25.2222	575.556	715.111	752.556	700.667	681.444	572.667	609.889	652.222	595.556	34	32.3333	40.1111
48	27.5556	30.3333	26.6667	575.333	716.778	753.111	706.333	680	573.556	613.222	662.444	597.778	36.8889	35.7778	43

## Sheet: Fig. 4D Erastin
ut	I3P 200uM	Erastin	Erastin + I3P 200uM
530	548	1597	615
409	533	1637	610
415	531	1687	614

## Sheet: Fig.4D RSL3
ut	I3P 200uM	RSL3 1 µM	rsl3 + I3P 200uM
530	548	834	526
409	533	822	499
415	531	809	511
