# Supplementary material for: Anti-ferroptotic mechanism of IL4i1-mediated amino acid metabolism
Source: eLife. 2021 Mar 1;10:e64806. doi: 10.7554/eLife.64806 (PMC7946422; doi:10.7554/eLife.64806)
Supplement: Figure 5—source data 1. [file elife-64806-fig5-data1.xlsx]

## Sheet: Fig. 5A
H2O	PP	4HPP	I3P	Asc	Fer-1
1.00403	0.94839	0.605916	0.240277	0.122182	0.244138
0.990632	0.994266	0.652473	0.332709	0.130131	0.266394
0.994266	0.964742	0.617953	0.305002	0.123999	0.253903
1.01107	1.00789	0.688809	0.371544	0.143985	0.287969

## Sheet: Fig. 5B
hours	medium			I3P
0	609	621	627	842	825	830
1	598	590	601	699	685	698
2	600	608	614	660	666	656
3	614	617	632	650	636	653
4	622	618	607	620	611	625
5	626	613	616	612	609	613

## Sheet: Fig. 5D
hours	Erastin		I3P + Erastin		I3P washed away + Erastin
0	12.7778	10.5556	10.2222	9	7.44444	8.11111
2	15.8889	12	11.7778	10	9	8.88889
4	18	13.6667	14	11.7778	12.4444	10
6	19.6667	15.1111	15.8889	13.8889	13.2222	10.5556
8	23.2222	18	17.2222	15.8889	16	11.3333
10	47.5556	46.3333	21.5556	17.3333	18.6667	12.4444
12	293.555	263.889	25.3333	22.6667	23	16.1111
14	886.667	718.889	30.5556	27.8889	26.7778	19.7778
16	1344.56	1104.89	39.4444	36.1111	35.1111	23.3333
18	1657.33	1393.67	47.7778	45.1111	42.8889	28.7778
20	1870.33	1628.22	62.2222	57.4444	50.8889	36.4444
22	2026	1824.44	74.4444	67.3333	67.7778	44.2222
24	2153.22	2014.11	91.2222	86.5556	82.1111	54.6667
26	2263.44	2185.22	109.778	109	97.4444	64
28	2362.11	2339.89	131.667	141.889	124.222	77.8889
30	2435.56	2464.11	158	187.333	148.778	91.8889
32	2502.22	2565.67	184.111	237.222	186	111.444
34	2548.22	2659.78	223.222	304.222	226.667	132.667
36	2576.67	2740.78	261.111	395.445	270.778	160

## Sheet: Fig. 5E
hours	RSL3		I3P + RSL3		I3P washed away + RSL3
0	11.6667	14.2222	10.6667	11.1111	7.11111	8.77778
2	81.2222	80	12.7778	12.5556	87.8889	82.4444
4	447.778	416.555	14.1111	13	576.444	449.111
6	763.333	710.111	14.6667	13.8889	917.333	716.222
8	1020.44	960.111	15.1111	14.3333	1187.11	899
10	1190.56	1148.22	16.2222	16.4444	1373.78	1026.44
12	1323.11	1282	16.7778	18.7778	1489.22	1110.22
14	1414.11	1378.11	20.3333	20.5556	1569.67	1168.56
16	1482.44	1450	23.1111	23.4444	1625.89	1213.78
18	1535.22	1502.67	26.7778	26.1111	1668	1248.44
20	1584.44	1548.78	30.7778	27.4444	1699.89	1276.22
22	1619	1589.78	34.8889	29.3333	1726.67	1305.78
24	1651.44	1619.78	35.2222	29.4444	1745.67	1326.78
26	1679.22	1651.11	33.7778	33.5556	1767.56	1345.78
28	1708.78	1673.67	34.8889	36	1787.67	1364.33
30	1736.33	1701.56	38.1111	39.6667	1802.33	1377.33
32	1757.22	1723	39	40.1111	1816.33	1391
34	1778.56	1747.56	41.4444	44.8889	1827.56	1402.33
36	1800.33	1766.89	45.2222	51	1842.78	1409.67

## Sheet: Fig. 5F
ctrl	I3P
1.0107	1.24317
0.969916	1.21802
1.02398	1.45996
0.995404	1.01445
