# Supplementary material for: Anti-ferroptotic mechanism of IL4i1-mediated amino acid metabolism
Source: eLife. 2021 Mar 1;10:e64806. doi: 10.7554/eLife.64806 (PMC7946422; doi:10.7554/eLife.64806)
Supplement: Figure 6—source data 1. [file elife-64806-fig6-data1.xlsx]

## Sheet: Fig. 6B
group	total genes	name
I3P WT overlap	82	IFI16
		BTG2
		HECW2
		PPP1R2
		ALDH1A3
		TP53
		ADD3
		ABCG2
		C1S
		C1RL
		HMOX1
		SERPINB5
		AMMECR1
		GDA
		ALPG
		MARCKS
		CDKN1A
		CAT
		NRP1
		NR2F1
		DDIT4
		ABCC3
		ATXN10
		NTN4
		CSRP2
		QSOX1
		RXRA
		CYP2S1
		SLC44A2
		LOXL2
		MEOX1
		WNT5A
		SECTM1
		NLRC5
		DLX2
		ALDH3A2
		DDB2
		SPTSSA
		WNT9A
		H19
		MB
		NQO1
		CTDSP2
		LRRC8D
		ZFP36L1
		HLA-E
		C3
		ALDH3A1
		KCTD12
		DDR1
		TIPARP
		PODXL
		SLC6A6
		AC015712.6
		ACSL5
		NCOA7
		HSPB7
		CDKN2B
		ELF3
		ELOVL6
		OTULINL
		MEF2A
		DLX1
		TESC
		CYP1A1
		TXNRD1
		ESPN
		ZNF395
		BAX
		PDCD6-AHRR
		TXNIP
		GRN
		MEGF6
		CYP1B1
		COL16A1
		PBX1
		PRDM1
		ABCC4
		CBX6
		ALPP
		TINCR
		ERCC6
WT	247	CDK18
		VDR
		EMP1
		ASPH
		CD44
		CMBL
		PINK1
		UGCG
		RAB30
		NPAS2
		FECH
		GSR
		TKT
		VIT
		INPPL1
		SERPINE1
		KDM1A
		BICDL1
		LEPROT
		MCCC1
		TGIF1
		SQOR
		FTH1
		IER3
		GDF15
		C1R
		IFNGR1
		PPP1R15A
		MAFG
		TSPYL2
		BMF
		FTH1P2
		FBLN1
		LINC01895
		LOX
		STOM
		GSN
		LAMB2
		CYTH1
		HOMER3
		RPS27L
		AOPEP
		FTH1P8
		PHLDA3
		PDE2A
		MARCKSL1
		FTH1P23
		AKR1C1
		BBC3
		UNC5A
		PCDH1
		BPNT1
		SLC12A8
		PIR
		MAP2K2
		ABCC2
		KIAA0930
		TFE3
		SPSB1
		PSAP
		LUCAT1
		GPNMB
		TAOK3
		AKR1B10
		CACFD1
		HLA-A
		SCPEP1
		GJC1
		FAM102A
		PEX13
		NSMF
		UGDH
		PKD2
		HLA-H
		PPEF1
		ADM
		CAPG
		SDCBP
		FTH1P16
		GADD45A
		KLHL5
		SQSTM1
		NFYB
		ABHD4
		HES1
		KRT10
		ALDOC
		ZBED6CL
		FDXR
		SEL1L3
		PLEKHF1
		FTH1P10
		PTGS2
		TALDO1
		TCP11L2
		MDM2
		FTH1P5
		GFPT2
		RAB9A
		OSGIN1
		LHX4
		GNAI1
		STING1
		SLFN5
		GBP2
		MGAT4B
		ZNF217
		PGRMC2
		NAT8L
		GAS6-AS1
		ZNF706
		CABLES1
		FLYWCH1
		HDAC5
		GCNT2
		AKR1C3
		TXN
		PTGR1
		IPMK
		HSPB3
		AGFG2
		C4BPA
		MXD4
		CLCA2
		DCN
		TP53INP1
		NINJ1
		SFN
		AC089983.1
		PNRC1
		GCLM
		RASD2
		FZD2
		CCNG1
		TMEM156
		TOM1
		HLA-C
		COA6
		STAT5B
		GNE
		NORAD
		AKR1A1
		FTH1P20
		NTPCR
		TTYH3
		IDH2
		BCL6
		CDR2L
		RAP1GAP
		HK2
		CTSD
		G6PD
		TRIM16L
		SERPINB9P1
		KLF5
		EPHX1
		SLC7A11
		GSTM4
		SLC20A1
		TMSB4X
		LIMK1
		PSCA
		B4GALT5
		VAT1
		CEBPB
		ANXA4
		F2R
		THBS1
		LINC00942
		CYBRD1
		SLC35E2A
		AKR1B15
		CDA
		UBE2H
		PLEKHA6
		AKR1B1
		PRDX1
		WNT7B
		IGFL2-AS1
		LRP10
		PGD
		ERMP1
		FOLR1
		SLC35E2B
		ETS1
		MR1
		IER5
		CALCOCO1
		CCNG2
		CRYBG1
		IL6R
		CHRM1
		TMSB4XP8
		FBXO2
		FDPS
		SNCG
		ALAS1
		SELENBP1
		RESF1
		CES1
		NEU1
		SMIM14
		AKR1C2
		INSIG1
		GCLC
		FTH1P12
		EPGN
		PGPEP1
		PARD6B
		FADS2
		HSPA12A
		APOBEC3B
		PANX2
		DOCK11
		MGST1
		GSTM3
		ZMAT3
		TRIM16
		BLVRB
		IRF2BPL
		GPRC5C
		RHOQ
		AHCYL1
		CD70
		MVP
		NMRAL2P
		PERP
		GNG11
		FTH1P3
		FAM171A2
		CPNE2
		FTH1P11
		FTH1P7
		KLHL24
		S100A10
		IQSEC2
		EGFL7
		APOBEC3C
		FTL
		TPRA1
		ACSS2
		CLIP4
		WLS
		GAA
		CTSC
		FTLP3
		MAGEF1
I3P	9	TNFAIP2
		PLCD3
		SLC12A3
		APOL6
		CARD10
		NPY4R
		TRIOBP
		PLXNB2
		NPY4R2

## Sheet: Fig. 6C
mIL4i1 [ng/ml]	WT			K351A			crtl
0							651	638	689
62.5	700	694	699	674	671	676
125	720	733	727	659	659	647
250	792	782	780	650	667	662
500	911	916	907	665	656	656
1000	1020	971	1057	654	665	667

## Sheet: Fig. 6F left graph
hours	Erastin		+ WT IL4i1		+ K357A IL4i1
0	4.55556	4.66667	4.55556	4.22222	4.44444	6.33333
2	5.88889	4.55556	5.88889	5	5.11111	6.88889
4	6.44444	5.33333	6.11111	5	5.88889	8.66667
6	8.22222	6.55556	7	6	7.22222	8.66667
8	12.1111	10.3333	8.33333	7	10.1111	12.8889
10	61.8889	63.5556	9.33333	8	51.4444	48
12	302.889	349	11.1111	9.66667	295.555	326.889
14	522.444	602.333	12.5556	11.7778	525.333	533.222
16	666.444	760.111	16.1111	14.5556	673.222	660.667
18	776.111	869.222	18.3333	17.6667	768.667	720.778
20	859.444	953.222	20.7778	18.8889	847.556	776.222
22	928	1019	26.7778	23	907	823.667
24	973.111	1073	34	28.7778	953.556	859
26	1007.44	1108.56	41.4444	33.7778	989.556	887
28	1040.11	1142.33	53.7778	44.1111	1013.11	904.444
30	1062.33	1163	71.4444	59.8889	1031.67	938.778
32	1073.67	1172.11	89.4444	74.1111	1045.11	947.556
34	1083.67	1180.22	109.556	90.7778	1051.89	951.556
36	1089.56	1187	135.667	116.222	1063.78	931.667

## Sheet: Fig. 6F right graph
hours	Erastin		1000 ng/ml mIL4i1		500 ng/ml mIL4i1		250 ng/ml mIL4i1		125 ng/ml mIL4i1		63 ng/ml mIL4i1
0	4.55556	4.66667	4.55556	4.22222	5.66667	4.66667	3.77778	2.88889	5.22222	4	3.33333	3.44444
2	5.88889	4.55556	5.88889	5	6.44444	5.88889	4.33333	3.22222	5.77778	6.55556	4.22222	3.55556
4	6.44444	5.33333	6.11111	5	6.22222	5.77778	4.33333	3.88889	6.33333	6.44444	5.33333	4.88889
6	8.22222	6.55556	7	6	6.33333	7.11111	6.22222	5.55556	6.77778	7.66667	6	5.22222
8	12.1111	10.3333	8.33333	7	7.66667	7.77778	6.77778	6.11111	8.33333	8.33333	7.55556	7.33333
10	61.8889	63.5556	9.33333	8	8.88889	8.55556	7.66667	8.22222	10.2222	9.66667	9.11111	8.77778
12	302.889	349	11.1111	9.66667	9.66667	11.5556	11.1111	10	12.8889	12.1111	18.7778	16.6667
14	522.444	602.333	12.5556	11.7778	12.2222	13.7778	13.4444	11.3333	16.4444	16.3333	69.2222	57.2222
16	666.444	760.111	16.1111	14.5556	14.8889	16.3333	16.3333	15.6667	22.5556	19.1111	235	179.889
18	776.111	869.222	18.3333	17.6667	16.5556	17.3333	19	18.1111	30.3333	26.7778	449.111	353
20	859.444	953.222	20.7778	18.8889	20	23.2222	23.2222	24.7778	41	38.2222	616.333	503.111
22	928	1019	26.7778	23	23.3333	29.2222	28.8889	29.6667	54.2222	55.7778	763.444	641.889
24	973.111	1073	34	28.7778	32	32.3333	35.2222	35.8889	72.1111	77.3333	882.667	766.222
26	1007.44	1108.56	41.4444	33.7778	42.2222	41	43.4444	47	92.7778	105.556	997.111	875.889
28	1040.11	1142.33	53.7778	44.1111	50.4444	47.5556	59.4444	64.2222	126.444	145.111	1093.78	983.778
30	1062.33	1163	71.4444	59.8889	65.2222	64.5556	76.7778	81.6667	162.556	204.333	1174.22	1074.56
32	1073.67	1172.11	89.4444	74.1111	82.1111	79.1111	96.8889	103.111	207.667	260	1237	1147.33
34	1083.67	1180.22	109.556	90.7778	101.667	97.3333	115.222	122.556	247.556	307.778	1294.56	1203.89
36	1089.56	1187	135.667	116.222	127	115.222	133.333	142.444	286.555	339.445	1337.67	1252.33
