# Supplementary material for: Anti-ferroptotic mechanism of IL4i1-mediated amino acid metabolism
Source: eLife. 2021 Mar 1;10:e64806. doi: 10.7554/eLife.64806 (PMC7946422; doi:10.7554/eLife.64806)
Supplement: Supplementary file 1. [file elife-64806-supp1.xlsx]

## Sheet: Sheet1
Analysis Type:	PANTHER Overrepresentation Test (Released 20200728)
Annotation Version and Release Date:	GO Ontology database DOI: 10.5281/zenodo.4033054 Released 2020-09-10
Analyzed List:	sign up cutoff p smaller e-9.txt (Homo sapiens)
Reference List:	genes detected.txt (Homo sapiens)	There are duplicate IDs in the file. The unique set of IDs will be used.
Test Type:	FISHER
Correction:	FDR
GO biological process complete	# in reference list	# in analyzed list	expected #	over/under representation	fold Enrichment	raw P-value	FDR
amino acid import across plasma membrane (GO:0089718)	22	6	0.14	+	42.02	2.04e-08	0.000306
L-serine metabolic process (GO:0006563)	12	5	0.08	+	64.2	5.81e-08	0.000435
oxidation-reduction process (GO:0055114)	749	20	4.86	+	4.11	6.94e-08	0.000346
amino acid import (GO:0043090)	28	6	0.18	+	33.02	7.07e-08	0.000265
cellular response to oxygen-containing compound (GO:1901701)	791	20	5.13	+	3.9	1.65e-07	0.000494
cellular response to oxidative stress (GO:0034599)	216	11	1.4	+	7.85	2.24e-07	0.000558
serine family amino acid biosynthetic process (GO:0009070)	17	5	0.11	+	45.32	2.41e-07	0.000515
serine family amino acid metabolic process (GO:0009069)	36	6	0.23	+	25.68	2.65e-07	0.000495
response to oxidative stress (GO:0006979)	332	13	2.15	+	6.03	3.06e-07	0.000508
response to oxygen-containing compound (GO:1901700)	1165	24	7.56	+	3.17	3.15e-07	0.000471
carboxylic acid metabolic process (GO:0019752)	676	18	4.39	+	4.1	3.66e-07	0.000499
L-alpha-amino acid transmembrane transport (GO:1902475)	40	6	0.26	+	23.11	4.63e-07	0.000578
cellular amino acid biosynthetic process (GO:0008652)	67	7	0.43	+	16.1	4.65e-07	0.000535
L-amino acid transport (GO:0015807)	45	6	0.29	+	20.55	8.68e-07	0.000928
cellular response to chemical stress (GO:0062197)	254	11	1.65	+	6.67	1.04e-06	0.00104
cellular response to chemical stimulus (GO:0070887)	2151	33	13.96	+	2.36	1.13e-06	0.00106
reactive oxygen species metabolic process (GO:0072593)	78	7	0.51	+	13.83	1.2e-06	0.001
leukocyte migration (GO:0050900)	205	10	1.33	+	7.52	1.2e-06	0.00105
oxoacid metabolic process (GO:0043436)	741	18	4.81	+	3.74	1.34e-06	0.00106
alpha-amino acid metabolic process (GO:1901605)	161	9	1.04	+	8.61	1.45e-06	0.00109
organic acid metabolic process (GO:0006082)	753	18	4.89	+	3.68	1.68e-06	0.0012
import into cell (GO:0098657)	123	8	0.8	+	10.02	1.98e-06	0.00135
neutral amino acid transport (GO:0015804)	28	5	0.18	+	27.52	2.05e-06	0.00134
alpha-amino acid biosynthetic process (GO:1901607)	54	6	0.35	+	17.12	2.3e-06	0.00144
import across plasma membrane (GO:0098739)	87	7	0.56	+	12.4	2.38e-06	0.00143
amino acid transmembrane transport (GO:0003333)	60	6	0.39	+	15.41	4.05e-06	0.00233
cellular modified amino acid metabolic process (GO:0006575)	140	8	0.91	+	8.81	4.93e-06	0.00273
response to organic substance (GO:0010033)	2239	32	14.53	+	2.2	8.78e-06	0.00469
response to jasmonic acid (GO:0009753)	4	3	0.03	+	> 100	8.91e-06	0.00445
cellular response to jasmonic acid stimulus (GO:0071395)	4	3	0.03	+	> 100	8.91e-06	0.0046
hormone metabolic process (GO:0042445)	114	7	0.74	+	9.46	1.28e-05	0.00616
response to chemical (GO:0042221)	2891	37	18.76	+	1.97	1.32e-05	0.00619
dicarboxylic acid metabolic process (GO:0043648)	75	6	0.49	+	12.33	1.34e-05	0.00607
response to organic cyclic compound (GO:0014070)	635	15	4.12	+	3.64	1.6e-05	0.00704
response to toxic substance (GO:0009636)	166	8	1.08	+	7.43	1.62e-05	0.00692
cellular response to corticosteroid stimulus (GO:0071384)	45	5	0.29	+	17.12	1.68e-05	0.00699
cellular response to ketone (GO:1901655)	80	6	0.52	+	11.56	1.89e-05	0.00765
immune system process (GO:0002376)	1895	28	12.3	+	2.28	1.93e-05	0.00761
cellular amino acid metabolic process (GO:0006520)	232	9	1.51	+	5.98	2.47e-05	0.00947
cellular response to dexamethasone stimulus (GO:0071549)	23	4	0.15	+	26.8	2.53e-05	0.00948
sequestering of metal ion (GO:0051238)	7	3	0.05	+	66.04	3.01e-05	0.011
polyketide metabolic process (GO:0030638)	8	3	0.05	+	57.78	4.12e-05	0.0137
daunorubicin metabolic process (GO:0044597)	8	3	0.05	+	57.78	4.12e-05	0.014
doxorubicin metabolic process (GO:0044598)	8	3	0.05	+	57.78	4.12e-05	0.0143
L-serine biosynthetic process (GO:0006564)	8	3	0.05	+	57.78	4.12e-05	0.0147
secretion by cell (GO:0032940)	777	16	5.04	+	3.17	4.2e-05	0.0137
superoxide metabolic process (GO:0006801)	27	4	0.18	+	22.83	4.45e-05	0.0142
response to external stimulus (GO:0009605)	1651	25	10.71	+	2.33	4.9e-05	0.0153
amino acid transport (GO:0006865)	96	6	0.62	+	9.63	4.99e-05	0.0152
response to dexamethasone (GO:0071548)	28	4	0.18	+	22.01	5.07e-05	0.0152
aminoglycoside antibiotic metabolic process (GO:0030647)	9	3	0.06	+	51.36	5.47e-05	0.0157
tertiary alcohol metabolic process (GO:1902644)	9	3	0.06	+	51.36	5.47e-05	0.0161
cellular response to hormone stimulus (GO:0032870)	397	11	2.58	+	4.27	6.11e-05	0.0172
secondary metabolic process (GO:0019748)	30	4	0.19	+	20.55	6.47e-05	0.0179
export from cell (GO:0140352)	807	16	5.24	+	3.06	6.54e-05	0.0178
carboxylic acid transmembrane transport (GO:1905039)	102	6	0.66	+	9.06	6.87e-05	0.0184
progesterone metabolic process (GO:0042448)	10	3	0.06	+	46.23	7.08e-05	0.0186
organic acid transmembrane transport (GO:1903825)	103	6	0.67	+	8.98	7.23e-05	0.0187
response to fungus (GO:0009620)	32	4	0.21	+	19.26	8.14e-05	0.0206
response to extracellular stimulus (GO:0009991)	413	11	2.68	+	4.1	8.62e-05	0.0215
exocytosis (GO:0006887)	656	14	4.26	+	3.29	9.28e-05	0.0228
regulation of hormone levels (GO:0010817)	351	10	2.28	+	4.39	0.000108	0.0261
retinal metabolic process (GO:0042574)	12	3	0.08	+	38.52	0.000112	0.0261
cysteine metabolic process (GO:0006534)	12	3	0.08	+	38.52	0.000112	0.0265
secretion (GO:0046903)	851	16	5.52	+	2.9	0.000121	0.0278
cellular response to reactive oxygen species (GO:0034614)	114	6	0.74	+	8.11	0.000123	0.028
response to stress (GO:0006950)	2703	33	17.54	+	1.88	0.000151	0.0338
response to hormone (GO:0009725)	603	13	3.91	+	3.32	0.000153	0.0338
cellular hormone metabolic process (GO:0034754)	74	5	0.48	+	10.41	0.000154	0.0335
cellular response to organic cyclic compound (GO:0071407)	369	10	2.39	+	4.18	0.000161	0.0344
carboxylic acid biosynthetic process (GO:0046394)	236	8	1.53	+	5.22	0.000176	0.0371
organic acid biosynthetic process (GO:0016053)	237	8	1.54	+	5.2	0.000181	0.0376
small molecule biosynthetic process (GO:0044283)	456	11	2.96	+	3.72	0.000201	0.0413
cellular response to glucocorticoid stimulus (GO:0071385)	42	4	0.27	+	14.68	0.000215	0.0434
response to nutrient levels (GO:0031667)	385	10	2.5	+	4	0.000225	0.0448
phenylalanine transport (GO:0015823)	2	2	0.01	+	> 100	0.000245	0.0458
neutrophil aggregation (GO:0070488)	2	2	0.01	+	> 100	0.000245	0.0464
cysteine biosynthetic process from serine (GO:0006535)	2	2	0.01	+	> 100	0.000245	0.047
response to prostaglandin D (GO:0071798)	2	2	0.01	+	> 100	0.000245	0.0476
cellular response to prostaglandin D stimulus (GO:0071799)	2	2	0.01	+	> 100	0.000245	0.0482
circulatory system process (GO:0003013)	317	9	2.06	+	4.37	0.000249	0.046
regulation of biological quality (GO:0065008)	2981	35	19.35	+	1.81	0.000255	0.0466
tetrahydrofolate metabolic process (GO:0046653)	17	3	0.11	+	27.19	0.000273	0.0492
granulocyte chemotaxis (GO:0071621)	45	4	0.29	+	13.7	0.000275	0.0483
glutathione metabolic process (GO:0006749)	45	4	0.29	+	13.7	0.000275	0.0489
leukocyte chemotaxis (GO:0030595)	85	5	0.55	+	9.06	0.000285	0.0496
